# Supplementary material for: Fe3O4@SiO2@Au nanoparticles for MRI-guided chemo/NIR photothermal therapy of cancer cells
Source: Royal Society of Chemistry journal article supplement (doi:10.1039/d0ra03699d), 2020-01-01
Supplement: d0ra03699d1.pdf [file d0ra03699d1.pdf]

### Supplementary materials

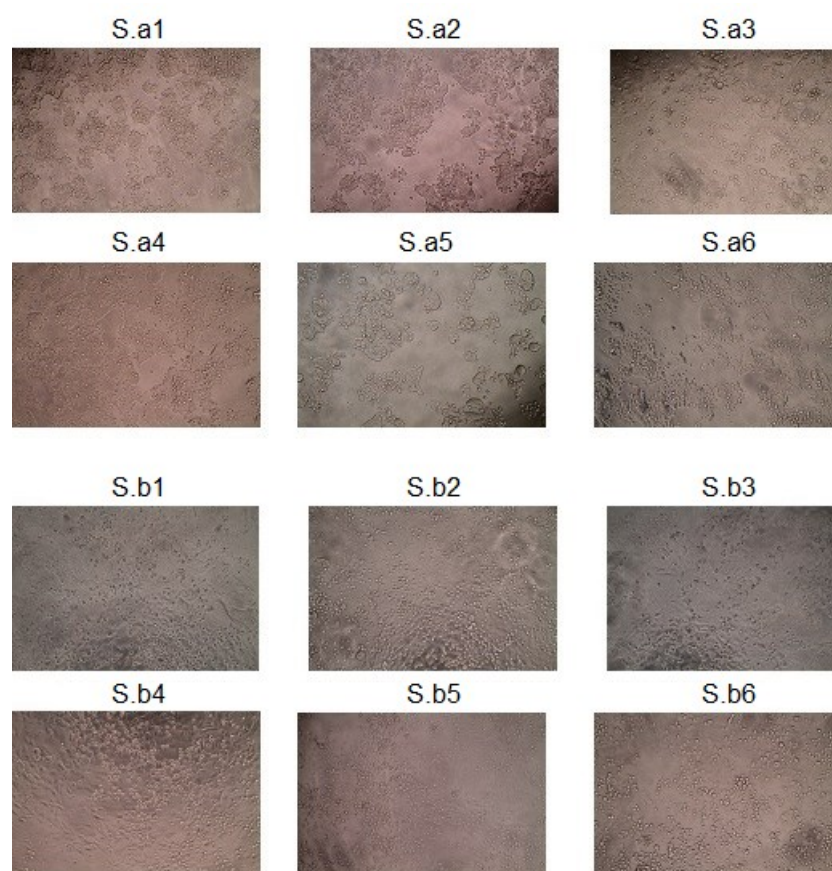

**Figure S1.** Microscopy images of colon cancer cells (SW480, SW620) morphology: C@NPs (S.a1, S.b1, respectively); C@cPt (S.a2, S.b2, respectively); C@cPtNPs (S.a3, S.b3, respectively); C@808 (S.a4, S.b4, respectively); C@808NPs (S.a5, S.b5, respectively); C@808cPt (S.a6, S.b6, respectively).
